# Supplementary material for: DRUM: A New Framework for Metabolic Modeling under Non-Balanced Growth. Application to the Carbon Metabolism of Unicellular Microalgae
Source: PubMed Central journal article supplement (PMC4126706; doi:10.1371/journal.pone.0104499), 2014-08-08
Supplement: pone.0104499.s006.pdf [file pone.0104499.s006.pdf]

# 1 File S1

---

## 2 1 Metabolic network construction of *Tisochrysis lutea*

3 The metabolic network of Kliphuis et al. in [1] was used as a starting point since this metabolic  
4 network is rather small and generic (152 metabolites, 160 reactions) and represents only the core  
5 metabolic network common to eukaryote microalgae (photosynthesis, glycolysis, pentose phosphate  
6 pathway, TCA cycle, oxidative phosphorylation, carbohydrate, lipids, protein, DNA, RNA, chlorophyll  
7 and biomass synthesis). Indeed, their representation is in large agreement with others metabolic  
8 network reconstruction of eukaryotic microalgae [1–8]. Some minor modifications of the metabolic  
9 network were performed (e.g.: transport reaction from the chloroplast) and reactions of  
10 macromolecules synthesis (lipids, proteins, DNA, RNA and biomass) were determined using  
11 experimental data of [9].

### 12 1.1 Lipids synthesis reaction

13 Lipids are classically represented as phosphatic acids (PA), composed of a glycerol 3-phosphate  
14 molecule with two average acetyl-ACP tails. The average acetyl-ACP chain was determined thanks to  
15 the molar fractions of the various fatty acids of *Isochrysis galbana* from [10]. This yielded the  
16 metabolic equations:

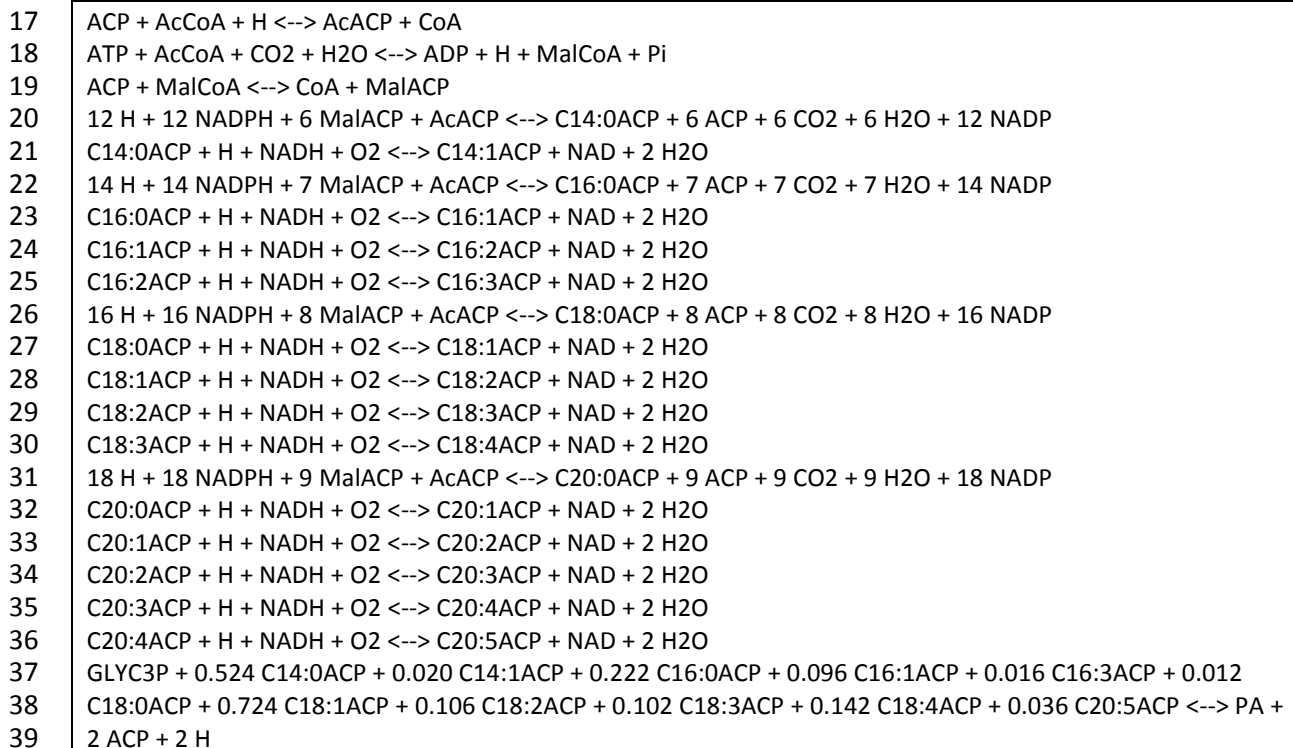

## 40 1.2 Protein synthesis reaction

41 Proteins are represented as an average protein determined thanks to the molar fraction of each  
42 amino acids present in the cell. Brown in [11] showed that the average composition of amino acids in  
43 microalgae does not significantly vary between microalgae species. Hence, we assume that the  
44 average composition of amino acids in *Tisochrysis lutea* is similar to the one of *Chlamydomonas*  
45 *reinhardtii*, and we used the protein synthesis reaction of [1]. In a similar way, we assumed that DNA  
46 and RNA were not significantly varying between eukaryote microalgae species and hence we also  
47 took the DNA and RNA synthesis reactions from [1].

## 48 1.3 Biomass synthesis equation

49 As we take into account accumulation of intracellular metabolites in our methodology, biomass  $B$   
50 has no longer the same significance. Indeed, the biomass is usually represented as an average  
51 composition of macromolecules present in the cell. For example, in the case of *Chlamydomonas*  
52 *reinhardtii*, the biomass is in average composed of 64.17% of protein, 27.13% of carbohydrates,  
53 4.53% of lipids, 3.05% of RNA, 1.02% of Chlorophyll and 0.11% DNA (molar ratios). But this average  
54 representation of the biomass constrains carbohydrates and lipids to a fixed percentage, which is not  
55 the case for microalgae under day/night cycles [9]. Hence lipids and carbohydrates are no longer part  
56 of the biomass equation and instead are metabolites authorized to accumulate ( $A$ ). Biomass is then  
57 uniquely composed of proteins, DNA, RNA and Chlorophyll, which we rename as functional biomass.  
58 Biomass composed of all the macromolecules of the cell is then the sum of metabolites authorized to  
59 accumulate  $A$  and functional biomass  $B$ :

$$X_Z(t) = \sum_A Z_A * A(t) + Z_B * B(t)$$

60 where  $Z$  correspond to a chemical element ( $Z \in \{C; N; O; H; P; S; \dots\}$ ),  $Z_A$  and  $Z_B$  corresponds to the  
61 number of chemical element  $Z$  per mole of accumulating metabolites  $A$  and biomass  $B$ ,  $A(t)$  and  
62  $B(t)$  correspond to the concentrations of  $A$  and  $B$  at time  $t$ , and  $X_Z(t)$  correspond to the  
63 concentration of chemical element  $Z$  in total biomass  $X$  at time  $t$ .

64 DNA and RNA contents were not measured in [9]. However, Geider and Laroche in [12] have shown  
65 that DNA and RNA contents do not vary much between microalgae species under nutrient-replete  
66 conditions. Hence, we assume that the DNA and RNA contents are similar between *Chlamydomonas*  
67 *reinhardtii* and *Tisochrysis lutea*.

68 Chlorophyll content was measured, yielding a mean value of  $0.0077 \text{ gN} \cdot \text{gN}^{-1}$ , which is significantly  
 69 lower than the value reported in [1] ( $0.0410 \text{ gN} \cdot \text{gN}^{-1}$ ). This difference can be easily explained by  
 70 the difference of light intensity applied in the two experiments: up to  $1500 \mu\text{E} \cdot \text{m}^{-2} \cdot \text{s}^{-1}$  in [9]  
 71 against  $100 \mu\text{E} \cdot \text{m}^{-2} \cdot \text{s}^{-1}$  in [1]. Because of photoadaptation, the content of chlorophyll per unit of  
 72 biomass decreases when light intensity increases [13].

73 Functional biomass can be indirectly deduced from the experimental data, thanks to a mass-balance  
 74 on intracellular carbon and nitrogen:

75  $X_C = C_A * A + C_B * B \Rightarrow B = \frac{(X_C - C_A * A)}{C_B} \approx \frac{X_C - C_{CARB} * CARB - C_{PA} * PA}{C_B}$ , because GAP, PEP and G6P  
 76 contributions in terms of carbon are assumed negligible.

77  $X_N = N_A * A + N_B * B = N_B * B$ , because all nitrogen is in the form of functional biomass.

- 78 • with  $X_C$  total intracellular carbon ( $\text{mM} \cdot \text{L}^{-1}$ )
- 79 •  $C_A$ : number of carbon atoms in a molecule of  $A$
- 80 •  $A$ : concentration of  $A$  ( $\text{mM} \cdot \text{L}^{-1}$ )
- 81 •  $C_B$ : number of carbon atoms in a molecule of  $B$
- 82 •  $B$ : concentration of  $B$  ( $\text{mM} \cdot \text{L}^{-1}$ )
- 83 •  $C_{CARB}$ : number of carbon atoms in a molecule of  $CARB$
- 84 •  $CARB$ : concentration of  $CARB$  ( $\text{mM} \cdot \text{L}^{-1}$ )
- 85 •  $C_{PA}$ : number of carbon atoms in a molecule of  $PA$
- 86 •  $PA$ : concentration of  $PA$  ( $\text{mM} \cdot \text{L}^{-1}$ )
- 87 •  $X_N$ : total intracellular nitrogen
- 88 •  $N_A$ : number of nitrogen atoms in a molecule of  $A$
- 89 •  $N_B$ : number of nitrogen atoms in a molecule of  $B$

90 Finally, protein content was assumed to be the same content as in [1]. Hence, we obtained the  
 91 following biomass equation:

92  $32.687 \text{ ATP} + 32.687 \text{ H}_2\text{O} + 0.9504 \text{ PROTEIN} + 0.0028 \text{ Chlorophyll} + 0.0452 \text{ RNA} + 0.0016 \text{ DNA} \rightarrow B +$   
 93  $32.687 \text{ H} + 32.687 \text{ ADP} + 32.687 \text{ Pi}$

94 The C/N ratio for the functional biomass obtained is 3.11. This value is lower than the average  
 95 experimental value (5.81). However, during the experiment only triacylglycerol (TAGs) lipids were

96 measured. To take into account others lipids present in the cell (e.g., cell walls) and hence match the  
 97 experimental C/N ratio, a quantity of PA was added in the functional biomass synthesis equation:

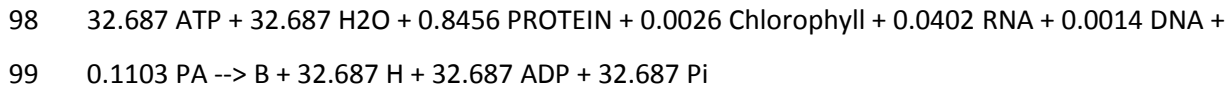

## 100 1.4 Other modifications

101 We removed glycerol synthesis and excretion reactions, because *Tisochrysis lutea* produces very low  
 102 quantities of glycerol. Starch synthesis was lumped in the overall carbohydrates pathway. The  
 103 reaction of conversion of NADPH to NADH was also removed, to prevent the non-use of the pentose  
 104 phosphate pathway, which is often a problem encountered in FBA [14]. We dropped as well  
 105 photorespiration which was experimentally found negligible [15], and changed the quantum yield of  
 106 photosynthesis to 10 photons per  $\text{CO}_2$  incorporated instead of 8, because not all light is taken up by  
 107 the photosystems and 10 is the predominant value that can be found in literature [1].

108 In addition, the irreversible reaction R104, which converts Acetyl-Coenzyme A to Malonyl-Coenzyme,  
 109 was found to prevent consumption of PAs during the night. Thus, R104 was assumed reversible.  
 110 Finally, GAP was assumed exported from the chloroplast, instead of DHAP, in accordance with [3].

## 111 1.5 Chemical Element Composition of the Macromolecules

112 Below is presented the chemical element composition of accumulating metabolites A and the  
 113 macromolecules of the cell of the metabolic network to *Tisochrysis Lutea*.

|              | C | H    | O     | N    | P    | S    |       |
|--------------|---|------|-------|------|------|------|-------|
| GAP          |   | 3    | 7     | 6    | 0    | 1    | 0     |
| G6P          |   | 6    | 13    | 9    | 0    | 1    | 0     |
| PEP          |   | 3    | 5     | 6    | 0    | 1    | 0     |
| CARB         |   | 6    | 10    | 5    | 0    | 0    | 0     |
| PA           |   | 36.2 | 63.4  | 8    | 0    | 1    | 0     |
| PROTEIN      |   | 4.8  | 7.6   | 1.5  | 1.3  | 0    | 0.03  |
| DNA          |   | 9.7  | 12.2  | 7    | 3.8  | 1    | 0     |
| RNA          |   | 9.5  | 12.8  | 8    | 3.8  | 1    | 0     |
| Chlorophylle |   | 55   | 72    | 5    | 4    | 0    | 0     |
| B            |   | 8.59 | 14.13 | 2.49 | 1.26 | 0.15 | 0.025 |

## 114 2 List of reactions

### Light step of photosynthesis

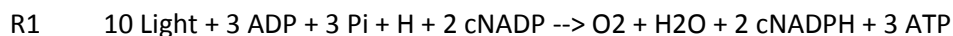

### Dark step of photosynthesis

R2  $\text{CO}_2 + \text{H}_2\text{O} + \text{cRu15DP} \rightarrow 2 \text{cG3P}$   
 R3  $\text{ATP} + \text{cG3P} \rightarrow \text{ADP} + \text{H} + \text{c13DPG}$   
 R4  $\text{H} + \text{cNADPH} + \text{c13DPG} \leftrightarrow \text{cNADP} + \text{Pi} + \text{cGAP}$   
 R5  $\text{cGAP} \leftrightarrow \text{cDHAP}$   
 R6  $\text{cDHAP} + \text{cGAP} \leftrightarrow \text{cF16P}$   
 R7  $\text{H}_2\text{O} + \text{cF16P} \leftrightarrow \text{Pi} + \text{cF6P}$   
 R8  $\text{cF6P} + \text{cGAP} \leftrightarrow \text{cE4P} + \text{cX5P}$   
 R9  $\text{H}_2\text{O} + \text{cE4P} + \text{cGAP} \leftrightarrow \text{Pi} + \text{cS7P}$   
 R10  $\text{cGAP} + \text{cS7P} \leftrightarrow \text{cR5P} + \text{cX5P}$   
 R11  $\text{cX5P} \leftrightarrow \text{cRu5P}$   
 R12  $\text{cR5P} \leftrightarrow \text{cRu5P}$   
 R13  $\text{ATP} + \text{cRu5P} \rightarrow \text{ADP} + \text{H} + \text{cRu15DP}$   
 R14  $\text{cGAP} \leftrightarrow \text{GAP}$

### **Glycolysis**

R15  $\text{G6P} \leftrightarrow \text{G1P}$   
 R16  $\text{F6P} \leftrightarrow \text{G6P}$   
 R17  $\text{ATP} + \text{F6P} \rightarrow \text{ADP} + \text{F16P} + \text{H}$   
 R18  $\text{F16P} + \text{H}_2\text{O} \rightarrow \text{F6P} + \text{Pi}$   
 R19  $\text{DHAP} + \text{GAP} \leftrightarrow \text{F16P}$   
 R20  $\text{DHAP} \leftrightarrow \text{GAP}$   
 R21  $\text{GAP} + \text{NAD} + \text{Pi} \leftrightarrow \text{13DPG} + \text{H} + \text{NADH}$   
 R22  $\text{13DPG} + \text{ADP} \leftrightarrow \text{3PG} + \text{ATP}$   
 R23  $\text{3PG} \leftrightarrow \text{2PG}$   
 R24  $\text{2PG} \leftrightarrow \text{H}_2\text{O} + \text{PEP}$   
 R25  $\text{ADP} + \text{H} + \text{PEP} \rightarrow \text{ATP} + \text{PYR}$

### **Tricarboxylic acid cycle**

R26  $\text{CoA} + \text{NAD} + \text{PYR} \rightarrow \text{AcCoA} + \text{CO}_2 + \text{NADH}$   
 R27  $\text{AcCoA} + \text{H}_2\text{O} + \text{OXA} \leftrightarrow \text{CIT} + \text{CoA} + \text{H}$   
 R28  $\text{CIT} + \text{NAD} \leftrightarrow \text{AKG} + \text{CO}_2 + \text{NADH}$   
 R29  $\text{AKG} + \text{CoA} + \text{NAD} \rightarrow \text{CO}_2 + \text{NADH} + \text{SUCCoA}$   
 R30  $\text{ADP} + \text{Pi} + \text{SUCCoA} \leftrightarrow \text{ATP} + \text{CoA} + \text{SUC}$   
 R31  $\text{FAD} + \text{SUC} \leftrightarrow \text{FADH}_2 + \text{FUM}$   
 R32  $\text{FUM} + \text{H}_2\text{O} \leftrightarrow \text{MAL}$   
 R33  $\text{FAD} + \text{MAL} \leftrightarrow \text{FADH}_2 + \text{OXA}$   
 R34  $\text{ATP} + \text{CO}_2 + \text{H}_2\text{O} + \text{PYR} \rightarrow \text{ADP} + \text{OXA} + \text{Pi} + 2 \text{H}$   
 R35  $\text{ATP} + \text{OXA} \rightarrow \text{ADP} + \text{CO}_2 + \text{PEP}$   
 R36  $\text{CO}_2 + \text{H}_2\text{O} + \text{PEP} \leftrightarrow \text{H} + \text{OXA} + \text{Pi}$

### **Pentose phosphate pathway**

R37  $\text{G6P} + \text{H}_2\text{O} + \text{NADP} \leftrightarrow \text{6PG} + \text{NADPH} + 2 \text{H}$   
 R38  $\text{6PG} + \text{NADP} \leftrightarrow \text{CO}_2 + \text{NADPH} + \text{RU5P}$   
 R39  $\text{RU5P} \leftrightarrow \text{R5P}$   
 R40  $\text{RU5P} \leftrightarrow \text{X5P}$   
 R41  $\text{R5P} + \text{X5P} \leftrightarrow \text{GAP} + \text{S7P}$   
 R42  $\text{GAP} + \text{S7P} \leftrightarrow \text{E4P} + \text{F6P}$   
 R43  $\text{F6P} + \text{GAP} \leftrightarrow \text{E4P} + \text{X5P}$

### **Glycerol synthesis**

R44 GLYC3P + NAD <--> DHAP + H + NADH

### **N fixation**

R45 H + NADH + NO3 <--> H2O + NAD + NO2

R46 5 H + 3 NADPH + NO2 <--> NH4 + 2 H2O + 3 NADP

### **S fixation**

R47 ATP + SO4 --> APS + PPi

R48 APS + NADH --> AMP + NAD + SO3

R49 5 H + 3 NADPH + SO3 <--> H2S + 3 H2O + 3 NADP

### **Oxidative phosphorylation**

R50 1.5 ADP + 1.5 H + 1.5 Pi + FADH2 + 0.5 O2 --> FAD + 1.5 ATP + 2.5 H2O

R51 3.5 H + 2.5 ADP + 2.5 Pi + NADH + 0.5 O2 --> NAD + 2.5 ATP + 3.5 H2O

R52 H2O + PPi --> H + 2 Pi

R53 AMP + ATP --> 2 ADP

R54 ATP + H2O --> ADP + H + Pi + MAINT

### **Amino acids and protein synthesis**

R55 AKG + H + NADPH + NH4 --> GLU + H2O + NADP

R56 ATP + GLU + NH4 --> ADP + GLN + H + Pi

R57 AKG + GLN + H + NADPH <--> NADP + 2 GLU

R58 3PG + GLU + H2O + NAD <--> AKG + H + NADH + Pi + SER

R59 SER --> NH4 + PYR

R60 AcCoA + H2S + SER <--> Ace + CYS + CoA + H

R61 ATP + Ace + CoA --> ADP + AcCoA + Pi

R62 GLU + PYR --> AKG + ALA

R63 H + THR <--> 2-oxobutan + NH4

R64 2-oxobutan + GLU + H + NADPH + PYR <--> AKG + CO2 + H2O + ILE + NADP

R65 2 H + ALA + NADPH + PYR <--> CO2 + H2O + NADP + VAL

R66 2 PYR + AcCoA + GLU + H + NAD + NADPH <--> AKG + CoA + LEU + NADH + NADP + 2 CO2

R67 2 PEP + ATP + E4P + NADPH --> ADP + CHO + NADP + 4 Pi

R68 CHO <--> PRE

R69 GLU + H + PRE <--> AKG + CO2 + H2O + PHE

R70 GLU + NAD + PRE <--> AKG + CO2 + NADH + TYR

R71 CHO + GLN <--> ANTH + GLU + H + PYR

R72 ANTH + H + PRPP + SER <--> CO2 + GAP + PPi + TRYP + 2 H2O

R73 3 H2O + 2 NAD + ATP + GLN + PRPP --> AICAR + AKG + HIS + Pi + 2 NADH + 2 PPi + 5 H

R74 GLU + OXA <--> AKG + ASP

R75 ASP + ATP + GLN + H2O --> ADP + ASN + GLU + H + Pi

R76 2 ATP + 2 H2O + CO2 + GLN --> CaP + GLU + Pi + 2 ADP + 3 H

R77 2 GLU + ASP + ATP + CaP + NADH --> AKG + AMP + ARG + FUM + H2O + NAD + PPi + Pi

R78 3 H + 2 NADH + GLU <--> PRO + 2 H2O + 2 NAD

R79 AKG + O2 + PRO <--> CO2 + HydPro + SUC

R80 ASP + ATP + H + NADPH --> ADP + ASA + NADP + Pi

R81 2 H + ASA + GLU + NADH + PYR <--> AKG + DAP + H2O + NAD

R82 DAP <--> CO2 + H + LYS

R83 ASA + H + NADPH <--> HSER + NADP

R84 ATP + H2O + HSER --> ADP + H + Pi + THR  
R85 AcCoA + CYS + H2O + HSER <--> Ace + CoA + HCYS + H + NH4 + PYR  
R86 HCYS + MTHF <--> H + MET + THF  
R87 4.306 ATP + 3.306 H2O + 0.111 ALA + 0.092 GLY + 0.09 LEU + 0.061 VAL + 0.06 LYS + 0.056  
PRO + 0.056 THR + 0.054 SER + 0.052 ARG + 0.052 GLN + 0.052 GLU + 0.047 ASN + 0.047 ASP  
+ 0.041 PHE + 0.037 ILE + 0.03 TYR + 0.024 MET + 0.017 HIS + 0.012 CYS + 0.0090 HydPro +  
0.0010 TRYP --> PROTEIN + 4.306 ADP + 4.306 Pi + 4.319 H  
R88 GLY + H + PYR <--> ALA + glyoxylate  
R89 SER + glyoxylate <--> GLY + HydPyr  
R90 GLY + H2O + METHF <--> SER + THF  
R91 GLY + NAD + THF <--> CO2 + METHF + NADH + NH4  
R92 H + HydPyr + NADH <--> Glycerate + NAD  
R93 ATP + Glycerate --> ADP + 2 H + 3PG  
**THF metabolism**  
R94 ATP + R5P --> AMP + H + PRPP  
R95 5FTHF + H <--> H2O + MYLTHF  
R96 H2O + MYLTHF <--> H + N10FTHF  
R97 ATP + FORM + THF --> ADP + N10FTHF + Pi  
R98 MYLTHF + NADPH <--> METHF + NADP  
R99 H + METHF + NADPH <--> MTHF + NADP  
R100 5FTHF + ATP + H2O --> ADP + H + N10FTHF + Pi  
R101 FORM + H + THF <--> H2O + N10FTHF  
R102 DHF + H + NADPH <--> NADP + THF  
**Lipids synthesis**  
R103 ACP + AcCoA + H <--> AcACP + CoA  
R104 ATP + AcCoA + CO2 + H2O <--> ADP + H + MalCoA + Pi  
R105 ACP + MalCoA <--> CoA + MalACP  
R106 12 H + 12 NADPH + 6 MalACP + AcACP <--> C14:0ACP + 6 ACP + 6 CO2 + 6 H2O + 12 NADP  
R107 C14:0ACP + H + NADH + O2 <--> C14:1ACP + NAD + 2 H2O  
R108 14 H + 14 NADPH + 7 MalACP + AcACP <--> C16:0ACP + 7 ACP + 7 CO2 + 7 H2O + 14 NADP  
R109 C16:0ACP + H + NADH + O2 <--> C16:1ACP + NAD + 2 H2O  
R110 C16:1ACP + H + NADH + O2 <--> C16:2ACP + NAD + 2 H2O  
R111 C16:2ACP + H + NADH + O2 <--> C16:3ACP + NAD + 2 H2O  
R112 16 H + 16 NADPH + 8 MalACP + AcACP <--> C18:0ACP + 8 ACP + 8 CO2 + 8 H2O + 16 NADP  
R113 C18:0ACP + H + NADH + O2 <--> C18:1ACP + NAD + 2 H2O  
R114 C18:1ACP + H + NADH + O2 <--> C18:2ACP + NAD + 2 H2O  
R115 C18:2ACP + H + NADH + O2 <--> C18:3ACP + NAD + 2 H2O  
R116 C18:3ACP + H + NADH + O2 <--> C18:4ACP + NAD + 2 H2O  
R117 18 H + 18 NADPH + 9 MalACP + AcACP <--> C20:0ACP + 9 ACP + 9 CO2 + 9 H2O + 18 NADP  
R118 C20:0ACP + H + NADH + O2 <--> C20:1ACP + NAD + 2 H2O  
R119 C20:1ACP + H + NADH + O2 <--> C20:2ACP + NAD + 2 H2O  
R120 C20:2ACP + H + NADH + O2 <--> C20:3ACP + NAD + 2 H2O  
R121 C20:3ACP + H + NADH + O2 <--> C20:4ACP + NAD + 2 H2O  
R122 C20:4ACP + H + NADH + O2 <--> C20:5ACP + NAD + 2 H2O  
R123 GLYC3P + 0.524 C14:0ACP + 0.02 C14:1ACP + 0.222 C16:0ACP + 0.096 C16:1ACP + 0.016

C16:3ACP + 0.012 C18:0ACP + 0.724 C18:1ACP + 0.106 C18:2ACP + 0.102 C18:3ACP + 0.142 C18:4ACP + 0.036 C20:5ACP <--> PA + 2 ACP + 2 H

#### **Nucleic acids synthesis**

- R124 4 ATP + 2 GLN + 2 H<sub>2</sub>O + ASP + CO<sub>2</sub> + GLY + N10FTHF + PRPP --> AICAR + FUM + PPi + THF + 2 GLU + 4 ADP + 4 Pi + 7 H
- R125 ASP + CaP + H + O<sub>2</sub> + PRPP <--> CO<sub>2</sub> + H<sub>2</sub>O + H<sub>2</sub>O<sub>2</sub> + PPi + Pi + UMP
- R126 2 H<sub>2</sub>O<sub>2</sub> <--> O<sub>2</sub> + 2 H<sub>2</sub>O
- R127 ATP + UMP --> ADP + UDP
- R128 ATP + UDP <--> ADP + UTP
- R129 ATP + GLN + H<sub>2</sub>O + UTP --> ADP + CTP + GLU + Pi + 2 H
- R130 ATP + CDP <--> ADP + CTP
- R131 AICAR + N10FTHF <--> H<sub>2</sub>O + IMP + THF
- R132 ATP + H<sub>2</sub>O + IMP + NAD + NH<sub>4</sub> --> AMP + GMP + NADH + PPi + 3 H
- R133 ATP + GMP --> ADP + GDP
- R134 ATP + GDP <--> ADP + GTP
- R135 ASP + GTP + IMP <--> AMP + FUM + GDP + Pi + 2 H
- R136 ATP + H + METHF + NADPH + UDP --> ADP + DHF + H<sub>2</sub>O + NADP + dTTP
- R137 ATP + CDP + H + NADPH --> ADP + H<sub>2</sub>O + NADP + dCTP
- R138 ATP + GDP + H + NADPH --> ADP + H<sub>2</sub>O + NADP + dGTP
- R139 ATP + H + NADPH <--> H<sub>2</sub>O + NADP + dATP
- R140 2.372 H<sub>2</sub>O + 1.372 ATP + 0.18 dATP + 0.18 dTTP + 0.32 dCTP + 0.32 dGTP --> DNA + PPi + 1.372 ADP + 1.372 Pi + 2.372 H
- R141 1.4 H<sub>2</sub>O + 0.56 ATP + 0.34 GTP + 0.16 UTP + 0.34 CTP --> 0.4 ADP + 0.4 H + 0.4 Pi + PPi + RNA

#### **Chlorophyll synthesis**

- R142 12 H + 8 ATP + 8 GLU + 8 NADPH + 2.5 O<sub>2</sub> --> PPorphyrin + 4 NH<sub>4</sub> + 6 CO<sub>2</sub> + 8 AMP + 8 NADP + 8 PPi + 13 H<sub>2</sub>O
- R143 18 H + 15 NADPH + 8 ATP + 4 GAP + 4 PYR --> Phytyl-PP + 4 ADP + 4 AMP + 4 CO<sub>2</sub> + 7 PPi + 8 H<sub>2</sub>O + 15 NADP
- R144 ATP + H<sub>2</sub>O + MET --> AdMET + H + PPi + Pi
- R145 AdHCYS + H<sub>2</sub>O <--> Ad + HCYS
- R146 ATP + Ad --> ADP + AMP + H
- R147 4 NADPH + 2.5 O<sub>2</sub> + 2 ATP + AdMET + Mg<sub>2</sub> + PPorphyrin + Phytyl-PP --> AdHCYS + Chlorophyll + PPi + 2 ADP + 2 H<sub>2</sub>O + 2 Pi + 3 H + 4 NADP

#### **Carbohydrate synthesis**

- R148 G1P <--> CARB + Pi

#### **Biomass synthesis**

- R149 32.687 ATP + 32.687 H<sub>2</sub>O + 0.8456 PROTEIN + 0.0026 Chlorophyll + 0.0402 RNA + 0.0014 DNA + 0.1103 PA --> B + 32.687 H + 32.687 ADP + 32.687 Pi

#### **Transport reactions**

- R150 # <--> CO<sub>2</sub>
- R151 # <--> O<sub>2</sub>
- R152 # <--> H<sub>2</sub>O
- R153 # <--> Pi
- R154 # <--> SO<sub>4</sub>
- R155 # <--> NO<sub>3</sub>
- R156 # <--> Mg<sub>2</sub>



R157 # --> Light  
R158 # <--> H  
R159 B --> #  
160 # <--> PA  
161 # <--> CARB  
162 MAINT --> #

### 115 3 List of metabolites

|     |            |                                              |
|-----|------------|----------------------------------------------|
| M1  | 13DPG      | 1,3-diPhosphoglycerate                       |
| M2  | 2-oxobutan | 2-Oxobutanoate                               |
| M3  | 2PG        | 2-Phosphoglycerate                           |
| M4  | 3PG        | 3-Phosphoglycerate                           |
| M5  | 5FTHF      | 5-Formyl-THF                                 |
| M6  | 6PG        | 6-Phosphogluconate                           |
| M7  | AcACP      | Acetyl-ACP                                   |
| M8  | AcCoA      | Acetyl-CoA                                   |
| M9  | Ace        | Acetate                                      |
| M10 | ACP        | Acetyl-carrier protein                       |
| M11 | Ad         | Adenosine                                    |
| M12 | AdHCYS     | S-Adenosyl-L-homocysteine                    |
| M13 | AdMET      | S-Adenosyl-L-methionine                      |
| M14 | ADP        | Adenosine diphosphate                        |
| M15 | AICAR      | 5-Aminoimidazole-4-carboxamide ribonucleine  |
| M16 | AKG        | 2-Oxoglutarate (alpha-ketoglutarate)         |
| M17 | ALA        | Alanine                                      |
| M18 | AMP        | Adenosine monophosphate                      |
| M19 | ANTH       | Anthranilate                                 |
| M20 | APS        | Adenylyl sulfate                             |
| M21 | ARG        | Arginine                                     |
| M22 | ASA        | L-Aspartic semialdehyde                      |
| M23 | ASN        | Asparagine                                   |
| M24 | ASP        | Aspartate                                    |
| M25 | ATP        | Adenosine triphosphate                       |
| M26 | B          | Functional biomass                           |
| M27 | c13DPG     | Chloroplast 1,3-diPhosphoglycerate           |
| M28 | C14:0ACP   | Tetradecanoyl-ACP (Myristic acid)            |
| M29 | C14:1ACP   | Myristoleic acid- ACP                        |
| M30 | C16:0ACP   | Hexadecanoyl-ACP (Palmitic acid)             |
| M31 | C16:1ACP   | Trans-Hexadec-2-enoyl-ACP (Palmitoleic acid) |
| M32 | C16:2ACP   | Hexadecadienoic acid -ACP                    |
| M33 | C16:3ACP   | Hexadecatrienoic acid -ACP                   |
| M34 | C18:0ACP   | Octadecanoyl-ACP (Stearic acid)              |
| M35 | C18:1ACP   | Cis-11-ocadecanoate-ACP (Oleic acid)         |

|     |             |                                                  |
|-----|-------------|--------------------------------------------------|
| M36 | C18:2ACP    | Linoleic acid -ACP                               |
| M37 | C18:3ACP    | Alpha-linoleic acid -ACP                         |
| M38 | C18:4ACP    | Octadecatetraenoic acid -ACP                     |
| M39 | C20:0ACP    | Arachidic acid -ACP                              |
| M40 | C20:1ACP    | Eicosacenoic acid -ACP                           |
| M41 | C20:2ACP    | Eicosadienoic acid -ACP                          |
| M42 | C20:3ACP    | Eicosatrienoic acid-ACP                          |
| M43 | C20:4ACP    | Arachodonic acid-ACP                             |
| M44 | C20:5ACP    | Eicosapentaenoic acid -ACP                       |
| M45 | CaP         | Carbamoyl phosphate                              |
| M46 | CARB        | Carbohydrate                                     |
| M47 | cDHAP       | Chloroplast dihydroxyacetone                     |
| M48 | CDP         | Cytidine diphosphate                             |
| M49 | cE4P        | Chloroplast erythrose 4-phosphate                |
| M50 | cF16P       | Chloroplast fructose 1,6-bisphosphate            |
| M51 | cF6P        | Chloroplast fructose 6-phosphate                 |
| M52 | cG3P        | Chloroplast 3-phosphoglycerate                   |
| M53 | cGAP        | Chloroplast glyceraldehyde 3-phosphate           |
| M54 | Chlorophyll | Chlorophyll                                      |
| M55 | CHO         | Chorismate                                       |
| M56 | CIT         | Citrate                                          |
| M57 | cNADP       | Chloroplast nicotinamidephosphate oxidized       |
| M58 | cNADPH      | Chloroplast nicotinamidephosphate reduced        |
| M59 | CO2         | Carbon dioxide                                   |
| M60 | CoA         | Coenzyme A                                       |
| M61 | cR5P        | Chloroplast ribose 5-phosphate                   |
| M62 | cRu15DP     | Chloroplast ribulose 1,5-phosphate               |
| M63 | cRu5P       | Chloroplast ribulose 5-phosphate                 |
| M64 | cS7P        | Chloroplast sedoheptulose 7-phosphate            |
| M65 | CTP         | Cytidine triphosphate                            |
| M66 | cX5P        | Chloroplast xylulose 5-phosphate                 |
| M67 | CYS         | Cysteine                                         |
| M68 | DAP         | Diaminopimelate                                  |
| M69 | dATP        | Deoxy ATP                                        |
| M70 | dCTP        | Deoxy CTP                                        |
| M71 | dGTP        | Deoxy GTP                                        |
| M72 | DHAP        | Dihydroxyacetone-Phosphate (Glycerone-Phosphate) |
| M73 | DHF         | Dihydrofolate                                    |
| M74 | DNA         | Deoxyribonucleic acid                            |
| M75 | dTTP        | Deoxy TTP                                        |
| M76 | E4P         | Erythrose 4-phosphate                            |
| M77 | F16P        | Fructose 1,6-bisphosphate                        |
| M78 | F6P         | Fructose 6-phosphate                             |
| M79 | FAD         | Flavin adenine dinucleotide oxidized             |
| M80 | FADH2       | Flavin adenine dinucleotide reduced              |

|      |            |                                |
|------|------------|--------------------------------|
| M81  | FORM       | Formic acid                    |
| M82  | FUM        | Fumarate                       |
| M83  | G1P        | Glucose 1-phosphate            |
| M84  | G6P        | Glucose 6-phosphate            |
| M85  | GAP        | Glyceraldehyde 3-phosphate     |
| M86  | GDP        | Guanosine diphosphate          |
| M87  | GLN        | Glutamine                      |
| M88  | GLU        | Glutamate                      |
| M89  | GLY        | Glycine                        |
| M90  | GLYC3P     | Glycerol 3-phosphate           |
| M91  | Glycerate  | Glycerate                      |
| M92  | glyoxylate | Glyoxylate                     |
| M93  | GMP        | Guanosine monophosphate        |
| M94  | GTP        | Guanosine triphosphate         |
| M95  | H          | Proton                         |
| M96  | H2O        | Water                          |
| M97  | H2O2       | Hydrogen peroxyde              |
| M98  | H2S        | Hydrogen sulfur                |
| M99  | HCYS       | Homocysteine                   |
| M100 | HIS        | Histidine                      |
| M101 | HSER       | Homoserine                     |
| M102 | HydPro     | Hydroxyproline                 |
| M103 | HydPyr     | 3-Hydroxyproline               |
| M104 | ILE        | Isoleucine                     |
| M105 | IMP        | Inosine monophosphate          |
| M106 | LEU        | Leucine                        |
| M107 | Light      | Photons                        |
| M108 | LYS        | Lysine                         |
| M109 | MAINT      | Maintenance term               |
| M110 | MAL        | Malate                         |
| M111 | MalACP     | Malonyl-ACP                    |
| M112 | MalCoA     | Malonyl-CoA                    |
| M113 | MET        | Methionine                     |
| M114 | METHF      | 5,10-Methylene-THF             |
| M115 | Mg2        | Magnesium                      |
| M116 | MTHF       | Methyl-THL                     |
| M117 | MYLTHF     | 5,10-Methenyl-THF              |
| M118 | N10FTHF    | 10-Formyl-THF                  |
| M119 | NAD        | Nicotinamide oxidized          |
| M120 | NADH       | Nicotinamide reduced           |
| M121 | NADP       | Nicotinamidephosphate oxidized |
| M122 | NADPH      | Nicotinamidephosphate reduced  |
| M123 | NH4        | Ammonium                       |
| M124 | NO2        | Nitrite                        |
| M125 | NO3        | Nitrate                        |

|      |            |                             |
|------|------------|-----------------------------|
| M126 | O2         | Oxygen                      |
| M127 | OXA        | Oxaloacetate                |
| M128 | PA         | Phosphatic Acid             |
| M129 | PEP        | Phosphoenolpyruvate         |
| M130 | PHE        | Phenylalanine               |
| M131 | Phytol-PP  | Phytol-diphosphate          |
| M132 | Pi         | Orthophosphate              |
| M133 | PPi        | Pyrophosphate               |
| M134 | PPorphyrin | Protoporphyrine             |
| M135 | PRE        | Prephanate                  |
| M136 | PRO        | Proline                     |
| M137 | PROTEIN    | Protein                     |
| M138 | PRPP       | Phosphorybosylpyrophosphate |
| M139 | PYR        | Pyruvate                    |
| M140 | R5P        | Ribose 5-phosphate          |
| M141 | RNA        | Ribonucleic acid            |
| M142 | RU5P       | Ribulose 5-phosphate        |
| M143 | S7P        | Sedoheptulose 7-phosphate   |
| M144 | SER        | Serine                      |
| M145 | SO3        | Sulphite                    |
| M146 | SO4        | Sulphate                    |
| M147 | SUC        | Succinate                   |
| M148 | SUCCoA     | Succinyl Coenzyme A         |
| M149 | THF        | Tetrahydrofolate            |
| M150 | THR        | Threonine                   |
| M151 | TRYP       | Tryptophan                  |
| M152 | TYR        | Tyrosine                    |
| M153 | UDP        | Uridine diphosphate         |
| M154 | UMP        | Uridine monophosphate       |
| M155 | UTP        | Uridine triphosphate        |
| M156 | VAL        | Valine                      |
| M157 | X5P        | Xylulose 5-phosphate        |

## 116 4 Analysis of the whole network

117 Elementary flux mode analysis of the whole network yielded 18776 modes, in which 17902 yielded  
118 biomass. Flux coupling analysis, using [16], indicated than no reactions were blocked.

## 119 5 List of sub-networks

| N°  | Name             | Reactions | Incoming metabolites                          | Outgoing metabolites |
|-----|------------------|-----------|-----------------------------------------------|----------------------|
| SN1 | Photosynthesis   | R1-R14    | Light, Pi, CO <sub>2</sub> , H <sub>2</sub> O | O <sub>2</sub> , GAP |
| SN2 | Upper glycolysis | R16-R20   | H <sub>2</sub> O, ATP, G6P, GAP               | H, ADP, Pi, G6P, GAP |

|     |                        |                                                 |                                                                                                           |                                                                                                           |
|-----|------------------------|-------------------------------------------------|-----------------------------------------------------------------------------------------------------------|-----------------------------------------------------------------------------------------------------------|
| SN3 | Lower glycolysis       | R21-R24                                         | GAP, PEP, Pi, ATP, ADP, NADH, NAD, H <sub>2</sub> O                                                       | GAP, PEP, Pi, ATP, ADP, NADH, NAD, H <sub>2</sub> O                                                       |
| SN4 | Carbohydrate synthesis | R15,R148                                        | Pi, G6P, CARB                                                                                             | Pi, G6P, CARB                                                                                             |
| SN5 | Lipids synthesis       | R25-R26, R44, R103-R123                         | GAP, PEP, PA, ATP, ADP, Pi, NADH, NAD, H, NADPH, NADP, H <sub>2</sub> O, CO <sub>2</sub> , O <sub>2</sub> | GAP, PEP, PA, ATP, ADP, Pi, NADH, NAD, H, NADPH, NADP, H <sub>2</sub> O, CO <sub>2</sub> , O <sub>2</sub> |
| SN6 | Biomass synthesis      | R16, R21-22, R25-R43, R45-R102, R124-R147, R149 | PEP, G6P, PA, H, O <sub>2</sub> , NO <sub>3</sub> , SO <sub>4</sub> , Mg                                  | H <sub>2</sub> O, CO <sub>2</sub> , Pi, B                                                                 |

## 120 6 Macroscopic reactions for biomass synthesis sub-network

### 121 6.1 Macroscopic reactions with biomass

#### 122 6.1.1 List of reactions

| N°     | Macroscopic reaction                                                                                                                                                                                                   |
|--------|------------------------------------------------------------------------------------------------------------------------------------------------------------------------------------------------------------------------|
| MR8.1  | 7.36572 O <sub>2</sub> + 4.45869 H + 3.1265 PEP + 1.30971 NO <sub>3</sub> + 1.14172 G6P + 0.1118 PA + 0.0303876 SO <sub>4</sub> + 0.0025 Mg --> 1 B + 4.22672 Pi + 6.00312 H <sub>2</sub> O + 11.6706 CO <sub>2</sub>  |
| MR8.2  | 7.36572 O <sub>2</sub> + 4.45869 H + 3.1265 PEP + 1.30971 NO <sub>3</sub> + 1.14172 G6P + 0.1118 PA + 0.0303876 SO <sub>4</sub> + 0.0025 Mg --> 1 B + 4.22672 Pi + 6.00312 H <sub>2</sub> O + 11.6706 CO <sub>2</sub>  |
| MR8.3  | 7.37689 O <sub>2</sub> + 4.46315 H + 3.13097 PEP + 1.30971 NO <sub>3</sub> + 1.14172 G6P + 0.1118 PA + 0.0303876 SO <sub>4</sub> + 0.0025 Mg --> 1 B + 4.23119 Pi + 6.00759 H <sub>2</sub> O + 11.684 CO <sub>2</sub>  |
| MR8.4  | 7.37689 O <sub>2</sub> + 4.46315 H + 3.13097 PEP + 1.30971 NO <sub>3</sub> + 1.14172 G6P + 0.1118 PA + 0.0303876 SO <sub>4</sub> + 0.0025 Mg --> 1 B + 4.23119 Pi + 6.00759 H <sub>2</sub> O + 11.684 CO <sub>2</sub>  |
| MR8.5  | 7.39476 O <sub>2</sub> + 4.4703 H + 3.13812 PEP + 1.30971 NO <sub>3</sub> + 1.14172 G6P + 0.1118 PA + 0.0303876 SO <sub>4</sub> + 0.0025 Mg --> 1 B + 4.23834 Pi + 6.01474 H <sub>2</sub> O + 11.7055 CO <sub>2</sub>  |
| MR8.6  | 7.39476 O <sub>2</sub> + 4.4703 H + 3.13812 PEP + 1.30971 NO <sub>3</sub> + 1.14172 G6P + 0.1118 PA + 0.0303876 SO <sub>4</sub> + 0.0025 Mg --> 1 B + 4.23834 Pi + 6.01474 H <sub>2</sub> O + 11.7055 CO <sub>2</sub>  |
| MR8.7  | 7.40593 O <sub>2</sub> + 4.47477 H + 3.14259 PEP + 1.30971 NO <sub>3</sub> + 1.14172 G6P + 0.1118 PA + 0.0303876 SO <sub>4</sub> + 0.0025 Mg --> 1 B + 4.24281 Pi + 6.0192 H <sub>2</sub> O + 11.7189 CO <sub>2</sub>  |
| MR8.8  | 7.40593 O <sub>2</sub> + 4.47477 H + 3.14259 PEP + 1.30971 NO <sub>3</sub> + 1.14172 G6P + 0.1118 PA + 0.0303876 SO <sub>4</sub> + 0.0025 Mg --> 1 B + 4.24281 Pi + 6.0192 H <sub>2</sub> O + 11.7189 CO <sub>2</sub>  |
| MR8.9  | 7.40952 O <sub>2</sub> + 4.4762 H + 3.14402 PEP + 1.30971 NO <sub>3</sub> + 1.14172 G6P + 0.1118 PA + 0.0303876 SO <sub>4</sub> + 0.0025 Mg --> 1 B + 4.24424 Pi + 6.02064 H <sub>2</sub> O + 11.7232 CO <sub>2</sub>  |
| MR8.10 | 7.40952 O <sub>2</sub> + 4.4762 H + 3.14402 PEP + 1.30971 NO <sub>3</sub> + 1.14172 G6P + 0.1118 PA + 0.0303876 SO <sub>4</sub> + 0.0025 Mg --> 1 B + 4.24424 Pi + 6.02064 H <sub>2</sub> O + 11.7232 CO <sub>2</sub>  |
| MR8.11 | 7.42069 O <sub>2</sub> + 4.48067 H + 3.14849 PEP + 1.30971 NO <sub>3</sub> + 1.14172 G6P + 0.1118 PA + 0.0303876 SO <sub>4</sub> + 0.0025 Mg --> 1 B + 4.24871 Pi + 6.02511 H <sub>2</sub> O + 11.7366 CO <sub>2</sub> |
| MR8.12 | 7.42069 O <sub>2</sub> + 4.48067 H + 3.14849 PEP + 1.30971 NO <sub>3</sub> + 1.14172 G6P + 0.1118 PA + 0.0303876 SO <sub>4</sub> + 0.0025 Mg --> 1 B + 4.24871 Pi + 6.02511 H <sub>2</sub> O + 11.7366 CO <sub>2</sub> |
| MR8.13 | 7.43856 O <sub>2</sub> + 4.48782 H + 3.15564 PEP + 1.30971 NO <sub>3</sub> + 1.14172 G6P + 0.1118 PA + 0.0303876 SO <sub>4</sub> + 0.0025 Mg --> 1 B + 4.25586 Pi + 6.03225 H <sub>2</sub> O + 11.758 CO <sub>2</sub>  |
| MR8.14 | 7.43856 O <sub>2</sub> + 4.48782 H + 3.15564 PEP + 1.30971 NO <sub>3</sub> + 1.14172 G6P + 0.1118 PA + 0.0303876 SO <sub>4</sub> + 0.0025 Mg --> 1 B + 4.25586 Pi + 6.03225 H <sub>2</sub> O + 11.758 CO <sub>2</sub>  |
| MR8.15 | 7.44973 O <sub>2</sub> + 4.49229 H + 3.16011 PEP + 1.30971 NO <sub>3</sub> + 1.14172 G6P + 0.1118 PA +                                                                                                                 |

|        |                                                                                                                                                                                                                                     |
|--------|-------------------------------------------------------------------------------------------------------------------------------------------------------------------------------------------------------------------------------------|
|        | 0.0303876 SO <sub>4</sub> + 0.0025 Mg --> 1 B + 4.26033 Pi + 6.03672 H <sub>2</sub> O + 11.7714 CO <sub>2</sub>                                                                                                                     |
| MR8.16 | 7.44973 O <sub>2</sub> + 4.49229 H + 3.16011 PEP + 1.30971 NO <sub>3</sub> + 1.14172 G6P + 0.1118 PA + 0.0303876 SO <sub>4</sub> + 0.0025 Mg <sub>2</sub> --> 1 B + 4.26033 Pi + 6.03672 H <sub>2</sub> O + 11.7714 CO <sub>2</sub> |
| MR8.17 | 7.80512 O <sub>2</sub> + 4.63445 H + 3.30226 PEP + 1.30971 NO <sub>3</sub> + 1.14172 G6P + 0.1118 PA + 0.0303876 SO <sub>4</sub> + 0.0025 Mg --> 1 B + 4.40248 Pi + 6.17888 H <sub>2</sub> O + 12.1979 CO <sub>2</sub>              |
| MR8.18 | 7.80512 O <sub>2</sub> + 4.63445 H + 3.30226 PEP + 1.30971 NO <sub>3</sub> + 1.14172 G6P + 0.1118 PA + 0.0303876 SO <sub>4</sub> + 0.0025 Mg --> 1 B + 4.40248 Pi + 6.17888 H <sub>2</sub> O + 12.1979 CO <sub>2</sub>              |
| MR8.19 | 7.81629 O <sub>2</sub> + 4.63891 H + 3.30673 PEP + 1.30971 NO <sub>3</sub> + 1.14172 G6P + 0.1118 PA + 0.0303876 SO <sub>4</sub> + 0.0025 Mg --> 1 B + 4.40695 Pi + 6.18335 H <sub>2</sub> O + 12.2113 CO <sub>2</sub>              |
| MR8.20 | 7.81629 O <sub>2</sub> + 4.63891 H + 3.30673 PEP + 1.30971 NO <sub>3</sub> + 1.14172 G6P + 0.1118 PA + 0.0303876 SO <sub>4</sub> + 0.0025 Mg --> 1 B + 4.40695 Pi + 6.18335 H <sub>2</sub> O + 12.2113 CO <sub>2</sub>              |
| MR8.21 | 7.83416 O <sub>2</sub> + 4.64606 H + 3.31388 PEP + 1.30971 NO <sub>3</sub> + 1.14172 G6P + 0.1118 PA + 0.0303876 SO <sub>4</sub> + 0.0025 Mg --> 1 B + 4.4141 Pi + 6.1905 H <sub>2</sub> O + 12.2328 CO <sub>2</sub>                |
| MR8.22 | 7.83416 O <sub>2</sub> + 4.64606 H + 3.31388 PEP + 1.30971 NO <sub>3</sub> + 1.14172 G6P + 0.1118 PA + 0.0303876 SO <sub>4</sub> + 0.0025 Mg --> 1 B + 4.4141 Pi + 6.1905 H <sub>2</sub> O + 12.2328 CO <sub>2</sub>                |
| MR8.23 | 7.84533 O <sub>2</sub> + 4.65053 H + 3.31835 PEP + 1.30971 NO <sub>3</sub> + 1.14172 G6P + 0.1118 PA + 0.0303876 SO <sub>4</sub> + 0.0025 Mg --> 1 B + 4.41857 Pi + 6.19496 H <sub>2</sub> O + 12.2462 CO <sub>2</sub>              |
| MR8.24 | 7.84533 O <sub>2</sub> + 4.65053 H + 3.31835 PEP + 1.30971 NO <sub>3</sub> + 1.14172 G6P + 0.1118 PA + 0.0303876 SO <sub>4</sub> + 0.0025 Mg --> 1 B + 4.41857 Pi + 6.19496 H <sub>2</sub> O + 12.2462 CO <sub>2</sub>              |

### 123 6.1.2 Principal component analysis

124 We projected the elementary flux modes normalized by unit of functional biomass into the yield  
 125 space (PEP function of CO<sub>2</sub>). There seemed to be two type of metabolic behavior: low production and  
 126 high production of CO<sub>2</sub> (Figure S1).

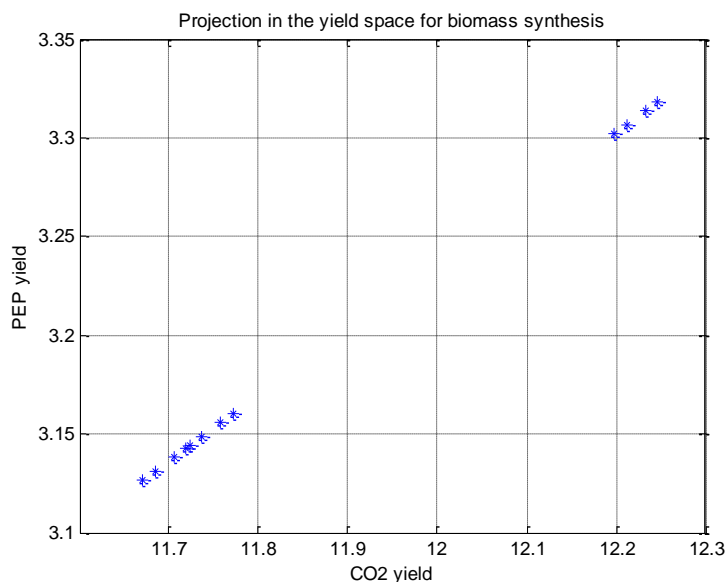

127  
 128 **Figure S1: Projection in the yield space of elementary flux modes obtained from the biomass synthesis sub-network.**

129 To understand the differences between these two groups, we performed a principal component  
 130 analysis on the elementary flux modes (Figure S2).

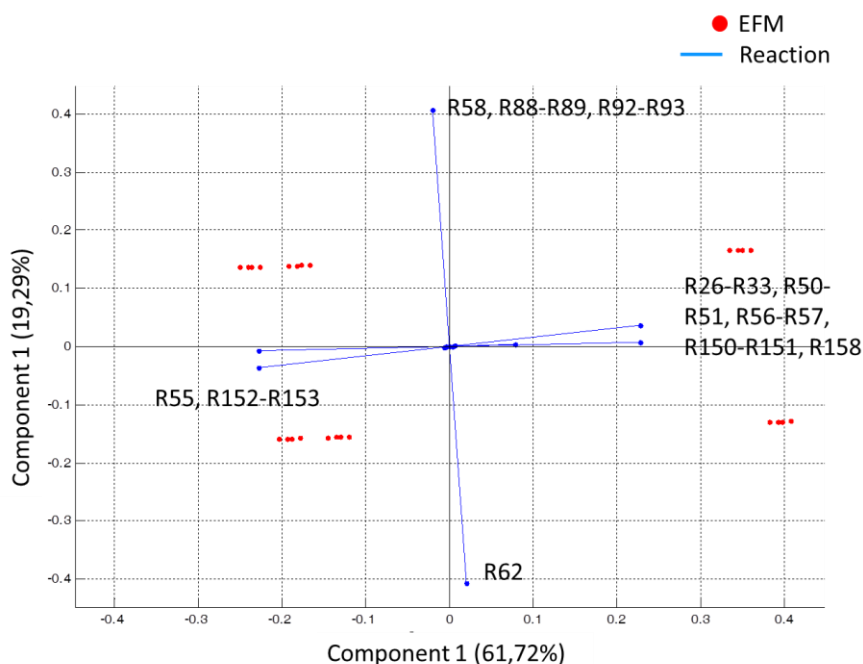

131

132 **Figure S2: Principal component analysis of the elementary flux modes obtained from the biomass synthesis sub-network.**  
 133 **The first two axes bear 80.81% of the information.**

134 For the first component (61.72% of information data), CO<sub>2</sub> excretion (R150) and O<sub>2</sub> consumption  
 135 (R151) are correlated with PEP consumption through the citric acid cycle (R26-R33) and oxidative  
 136 phosphorylation (R50-R51). Indeed, if more PEP is used, the citric acid cycle is more used and thus  
 137 CO<sub>2</sub> excretion and O<sub>2</sub> consumption increase. The difference of PEP consumption is due to the way  
 138 nitrogen is incorporated: either with glutamine (R55) or with glutamate (R56-R57). Incorporation of  
 139 azote with glutamate is energetically less efficient that with glutamine. Indeed, nitrogen  
 140 incorporation with glutamine only requires NADPH whereas incorporation with glutamate requires  
 141 NADPH and ATP, hence oxidative phosphorylation for ATP generation.

142 For the second component (19.29% of data information), EFM are different mainly because of the  
 143 way alanine is synthesized. Indeed, alanine is either synthesized directly from glutamine and  
 144 pyruvate (R62), or from glyoxylate (R58,R88-R89,R92-93).

## 145 6.2 Macroscopic reactions with no biomass

| N°     | Macroscopic reaction                                                                                              | Reactions taking place    | Explanation                                                           |
|--------|-------------------------------------------------------------------------------------------------------------------|---------------------------|-----------------------------------------------------------------------|
| MR8.25 | $2.5 \text{ O}_2 + 1 \text{ PEP} + 1 \text{ H} \rightarrow 1 \text{ H}_2\text{O} + 1 \text{ Pi} + 3 \text{ CO}_2$ | R25-R35, R50-R51          | Citric acid cycle + oxidative phosphorylation + anaplerotic reactions |
| MR8.26 | $2.5 \text{ O}_2 + 1 \text{ H} + 1 \text{ PEP} \rightarrow 1 \text{ Pi} + 1 \text{ H}_2\text{O} + 3 \text{ CO}_2$ | R25-R33, R35-R36, R50-R51 | Citric acid cycle + oxidative phosphorylation                         |

|        |                                                                                                                   |                                 |                                                                |
|--------|-------------------------------------------------------------------------------------------------------------------|---------------------------------|----------------------------------------------------------------|
|        |                                                                                                                   |                                 | + anaplerotic reactions                                        |
| MR8.27 | $2.5 \text{ O}_2 + 1 \text{ H} + 1 \text{ PEP} \rightarrow 1 \text{ Pi} + 1 \text{ H}_2\text{O} + 3 \text{ CO}_2$ | R25-R33, R50-R51, R54           | Citric acid cycle + oxidative phosphorylation + maintenance    |
| MR8.28 | $2.5 \text{ O}_2 + 1 \text{ H} + 1 \text{ PEP} \rightarrow 1 \text{ Pi} + 1 \text{ H}_2\text{O} + 3 \text{ CO}_2$ | R25-R33, R50-R51, R97, R101     | Citric acid cycle + oxidative phosphorylation + THF metabolism |
| MR8.29 | $2.5 \text{ O}_2 + 1 \text{ H} + 1 \text{ PEP} \rightarrow 1 \text{ Pi} + 1 \text{ H}_2\text{O} + 3 \text{ CO}_2$ | R25-R33, R50-R51, R95-R96, R100 | Citric acid cycle + oxidative phosphorylation + THF metabolism |
| MR8.30 | -                                                                                                                 | R25, R34, R36                   | Anaplerotic reactions                                          |

## 146 7 Metabolic engineering: deletion of MR6 forward reaction 147 (simulation conditions)

148 We tested the effect of the suppression of MR6 forward reaction on the metabolites concentration  
149 of the model. The two models were then simulated for 48h, one with  $k_{carb} = 0 \text{ h}^{-1} \cdot \text{mM B}^{-1}$ , the  
150 other one with  $k_{carb} = 70.00 \text{ h}^{-1} \cdot \text{mM B}^{-1}$ . The dilution rate and the incoming substrate  
151 concentrations were set at  $1 \text{ days}^{-1}$  and  $4.018 \text{ mgN.L}^{-1}$ .

## 152 References

- 153 1. Kliphuis AMJ, Klok AJ, Martens DE, Lamers PP, Janssen M, et al. (2011) Metabolic  
154 modeling of *Chlamydomonas reinhardtii*: energy requirements for photoautotrophic  
155 growth and maintenance. *J Appl Phycol* 24: 253–266.
- 156 2. Yang C, Hua Q, Shimizu K (2000) Energetics and carbon metabolism during growth of  
157 microalgal cells under photoautotrophic, mixotrophic and cyclic light-  
158 autotrophic/dark-heterotrophic conditions. *Biochem Eng J* 6: 87–102.
- 159 3. Boyle NR, Morgan JA (2009) Flux balance analysis of primary metabolism in  
160 *Chlamydomonas reinhardtii*. *BMC Syst Biol* 3: 1–14.
- 161 4. Manichaikul A, Ghamsari L, Hom E, Chin C, Murray R, et al. (2009) Metabolic network  
162 analysis integrated with transcript verification for sequenced genomes. *Nat Methods*  
163 6: 589–592.



- 164 5. Chang RL, Ghamsari L, Manichaikul A, Hom EFY, Balaji S, et al. (2011) Metabolic  
165 network reconstruction of *Chlamydomonas* offers insight into light-driven algal  
166 metabolism. *Mol Syst Biol* 7: 1–13.
- 167 6. Dal’Molin CGDO, Quek L-E, Palfreyman RW, Nielsen LK (2011) AlgaGEM--a genome-  
168 scale metabolic reconstruction of algae based on the *Chlamydomonas reinhardtii*  
169 genome. *BMC Genomics* 12 Suppl 4: S5.
- 170 7. Cogne G, Rügen M, Bockmayr A, Titica M, Dussap C-G, et al. (2011) A model-based  
171 method for investigating bioenergetic processes in autotrophically growing eukaryotic  
172 microalgae: application to the green algae *Chlamydomonas reinhardtii*. *Biotechnol*  
173 *Prog* 27: 631–640.
- 174 8. Krumholz EW, Yang H, Weisenhorn P, Henry CS, Libourel IGL (2012) Genome-wide  
175 metabolic network reconstruction of the picoalga *Ostreococcus*. *J Exp Bot* 63: 2353–  
176 2362.
- 177 9. Lacour T, Sciandra A, Talec A, Mayzaud P, Bernard O (2012) Diel Variations of  
178 Carbohydrates and Neutral Lipids in Nitrogen-Sufficient and Nitrogen-Starved  
179 *Cyclostat* Cultures of *Isochrysis* Sp. *J Phycol* 48: 966–975.
- 180 10. Griffiths MJ, Hille RP, Harrison STL (2011) Lipid productivity, settling potential and  
181 fatty acid profile of 11 microalgal species grown under nitrogen replete and limited  
182 conditions. *J Appl Phycol* 24: 989–1001.
- 183 11. Brown MR (1991) The amino-acid and sugar composition of 16 species of microalgae  
184 used in mariculture. *J Exp Mar Bio Ecol* 145: 79–99.
- 185 12. Geider R, La Roche J (2002) Redfield revisited: variability of C:N:P in marine microalgae  
186 and its biochemical basis. *Eur J Phycol* 37: 1–17.

- 187 13. MacIntyre H, Kana T, Anning T (2002) Photoacclimation of Photosynthesis Irradiance  
188 Response Curves and Photosynthetic Pigments in Microalgae and Cyanobacteria1. J  
189 Phycol 38: 17–38.
- 190 14. Cheung CYM, Williams TCR, Poolman MG, Fell D a., Ratcliffe RG, et al. (2013) A  
191 method for accounting for maintenance costs in flux balance analysis improves the  
192 prediction of plant cell metabolic phenotypes under stress conditions. Plant J 75:  
193 1050–1061.
- 194 15. Young JD, Shastri AA, Stephanopoulos G, Morgan JA (2011) Mapping  
195 photoautotrophic metabolism with isotopically nonstationary <sup>13</sup>C flux analysis.  
196 Metab Eng 13: 656–665.
- 197 16. Larhlimi A, David L, Selbig J, Bockmayr A (2012) F2C2: a fast tool for the computation  
198 of flux coupling in genome-scale metabolic networks. BMC Bioinformatics 13: 1–9.
- 199
